# Supplementary material for: Neutrophil extracellular traps are downregulated by glucocorticosteroids in lungs in an equine model of asthma
Source: Springer Nature journal article supplement (doi:10.1186/s12931-017-0689-4), 2017-12-01
Supplement: MOESM1 [file 15301654]

A

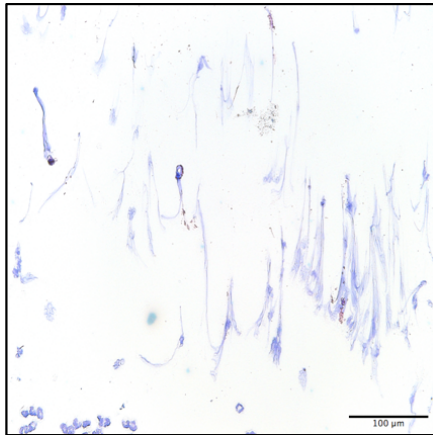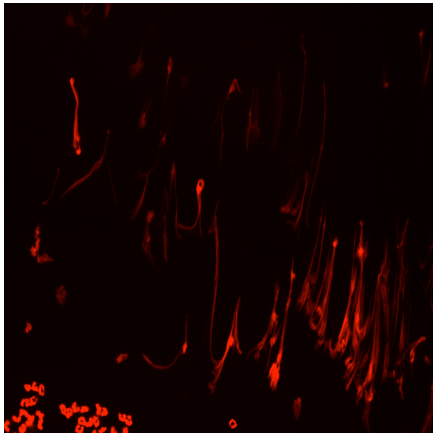

B

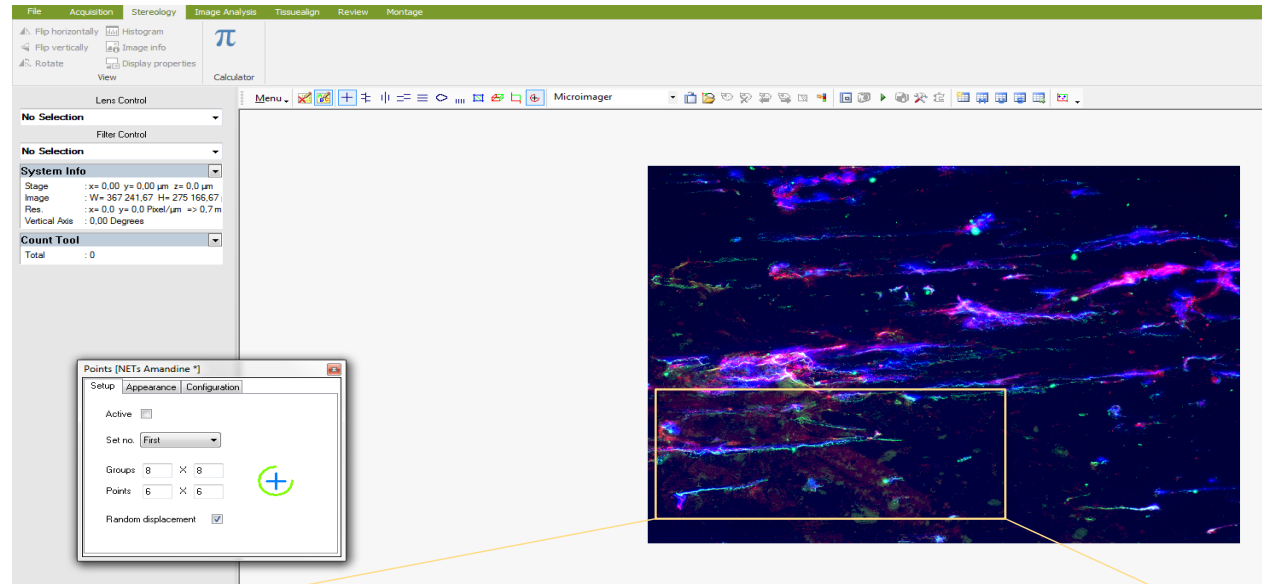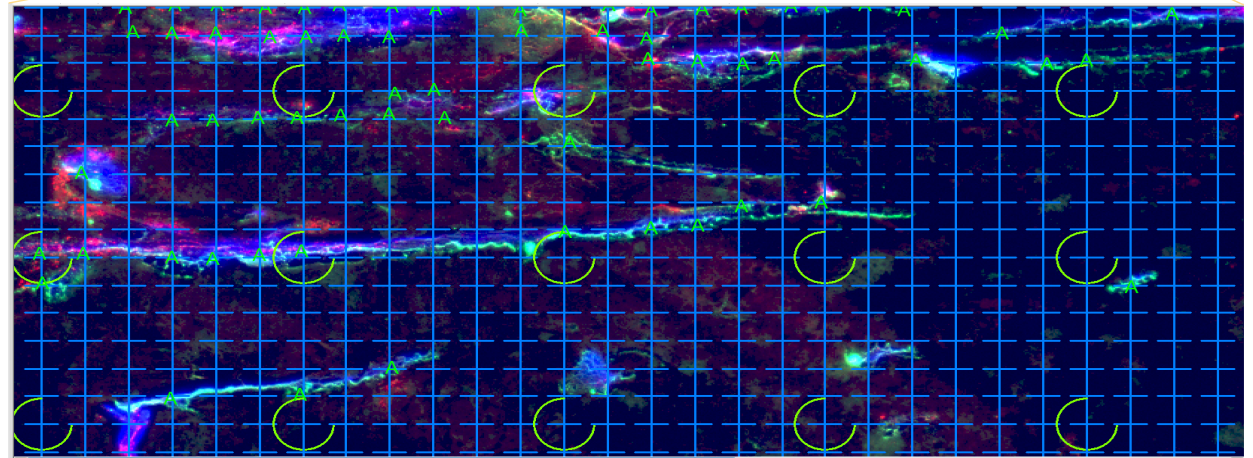

C

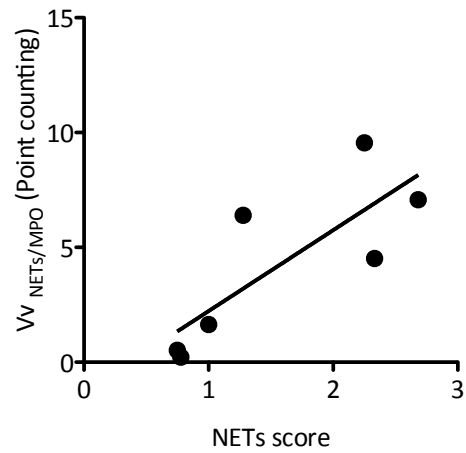

Figure 1
